# Supplementary material for: Probiotic Effects of Lactobacillus fermentum ZJUIDS06 and Lactobacillus plantarum ZY08 on Hypercholesteremic Golden Hamsters
Source: PubMed Central journal article supplement (PMC8273167; doi:10.3389/fnut.2021.705763), 2021-06-28
Supplement: Data_Sheet_1.pdf [file Data_Sheet_1.pdf]

## Support material

Table S1. Standard Diet Composition (g/kg)

| Components                  | Standard diet |
|-----------------------------|---------------|
| Moisture $\leq$             | 100           |
| Crude protein $\geq$        | 205           |
| Crude fat $\geq$            | 40            |
| Crude fiber $\leq$          | 50            |
| Crude ash $\leq$            | 80            |
| Calcium                     | 10-18         |
| Total phosphorus            | 6-12          |
| Calcium : Total phosphorus  | 1.2-1.7       |
| Lysine $\geq$               | 13.2          |
| Methionine + Cystine $\geq$ | 7.8           |

Complied with Chinese national standard GB14924.3-2010

Table S2. Organ weight after necropsy

| Organ weight       | NC                | HC                | LP                 | LF                 | SEM  | p-value |
|--------------------|-------------------|-------------------|--------------------|--------------------|------|---------|
| Liver (g)          | 5.45 <sup>b</sup> | 8.89 <sup>a</sup> | 8.97 <sup>a</sup>  | 8.36 <sup>a</sup>  | 0.34 | <0.01   |
| EFP (g)            | 4.19 <sup>b</sup> | 6.31 <sup>a</sup> | 6.52 <sup>a</sup>  | 5.96 <sup>a</sup>  | 0.28 | <0.01   |
| Relative liver (%) | 3.42 <sup>b</sup> | 4.88 <sup>a</sup> | 4.64 <sup>a</sup>  | 4.57 <sup>a</sup>  | 0.02 | <0.01   |
| Relative EFP (%)   | 2.60 <sup>b</sup> | 3.47 <sup>a</sup> | 3.35 <sup>ab</sup> | 3.25 <sup>ab</sup> | 0.12 | 0.034   |

*a, b: P-value*<0.05, EFP: Epididymal Fat Pad; Organ index was expressed as "relative organ /%": the ratio of the organ weight to the animal body weight

Table S3. Pairwise Anosim results

|              |              | <b>Sample size</b> | <b>Permutations</b> | <b>R</b> | <b>p-value</b> | <b>q-value</b> |
|--------------|--------------|--------------------|---------------------|----------|----------------|----------------|
| <b>Group</b> | <b>Group</b> |                    |                     |          |                |                |
| <b>1</b>     | <b>2</b>     |                    |                     |          |                |                |
| <b>HC</b>    | <b>LF</b>    | 13                 | 999                 | 0.293651 | 0.011          | 0.011          |
|              | <b>LP</b>    | 14                 | 999                 | 0.272109 | 0.005          | 0.006          |
|              | <b>NC</b>    | 14                 | 999                 | 0.598639 | 0.001          | 0.003          |
| <b>LF</b>    | <b>LP</b>    | 13                 | 999                 | 0.506614 | 0.002          | 0.003          |
|              | <b>NC</b>    | 13                 | 999                 | 0.812169 | 0.002          | 0.003          |
| <b>LP</b>    | <b>NC</b>    | 14                 | 999                 | 0.823129 | 0.002          | 0.003          |
| <b>HC</b>    | <b>LF</b>    | 13                 | 999                 | 0.293651 | 0.011          | 0.011          |

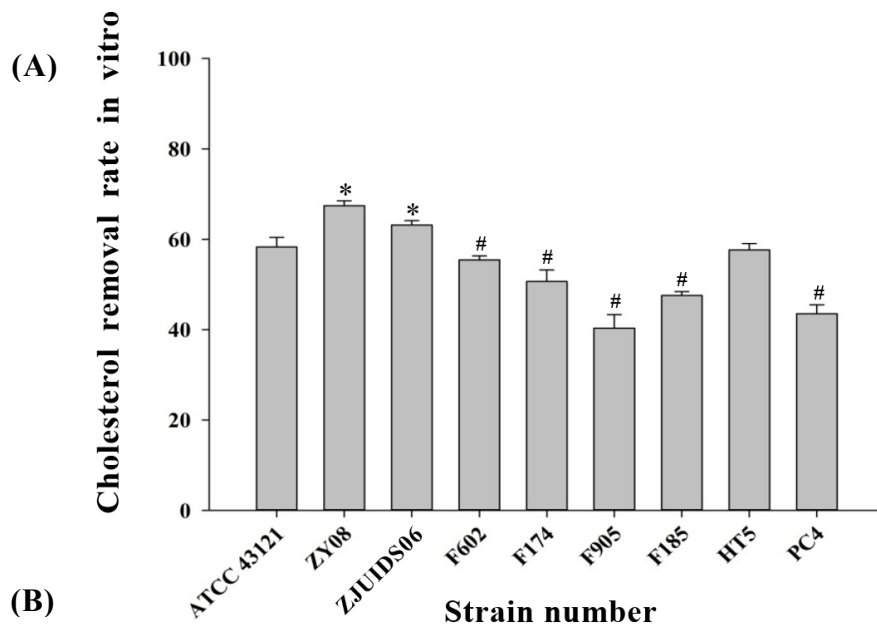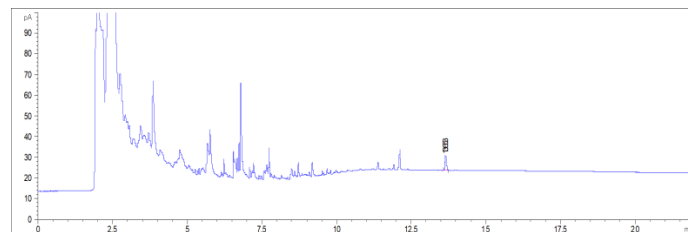

Figure S1. (A) Results of screening for cholesterol-lowering LAB strains; X-axis: Strain number; Y-axis: Cholesterol removal rate in vitro (%); (B) GC pattern of cholesterol; the strains with F and ZY08 and ZJUIDS06 are from infant feces, PC is from pickles, HT is from Jinhua ham. A \* symbol indicates that the representative value was significantly higher than that of ATCC 43121 ( $p < 0.05$ ); A# symbol indicates that the representative value was significantly lower than that of ATCC 43121 ( $p < 0.05$ ).

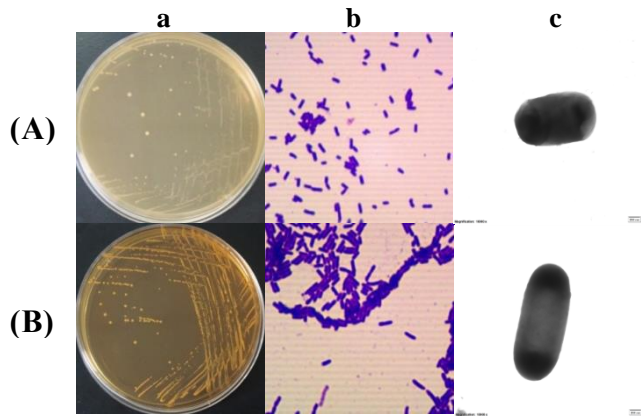

Figure S2. (a) Colony morphology; (b) Cell morphology (1000×); (c) Cell morphology (10000×)

(A) *Lactobacillus plantarum* ZY08; (B) *Lactobacillus fermentans* ZJUIDS06;

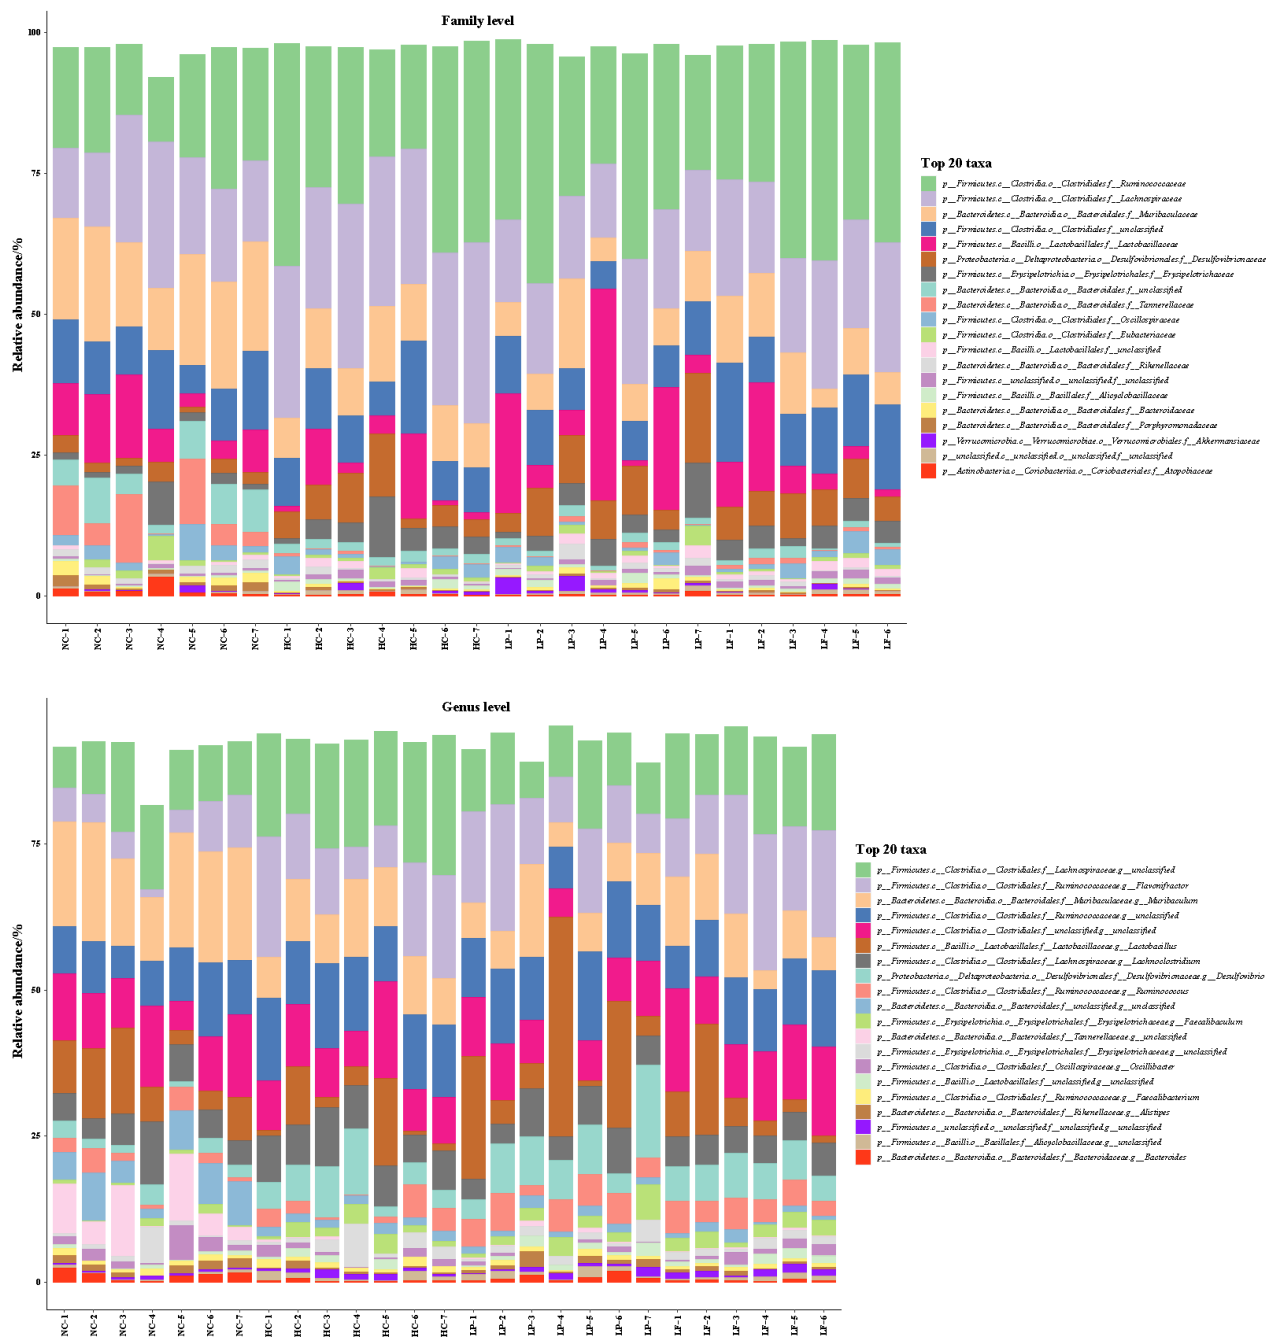

Figure S3. The top 20 taxa of cecum microbial composition at family and genus level. X-axis: different individuals of golden hamster.

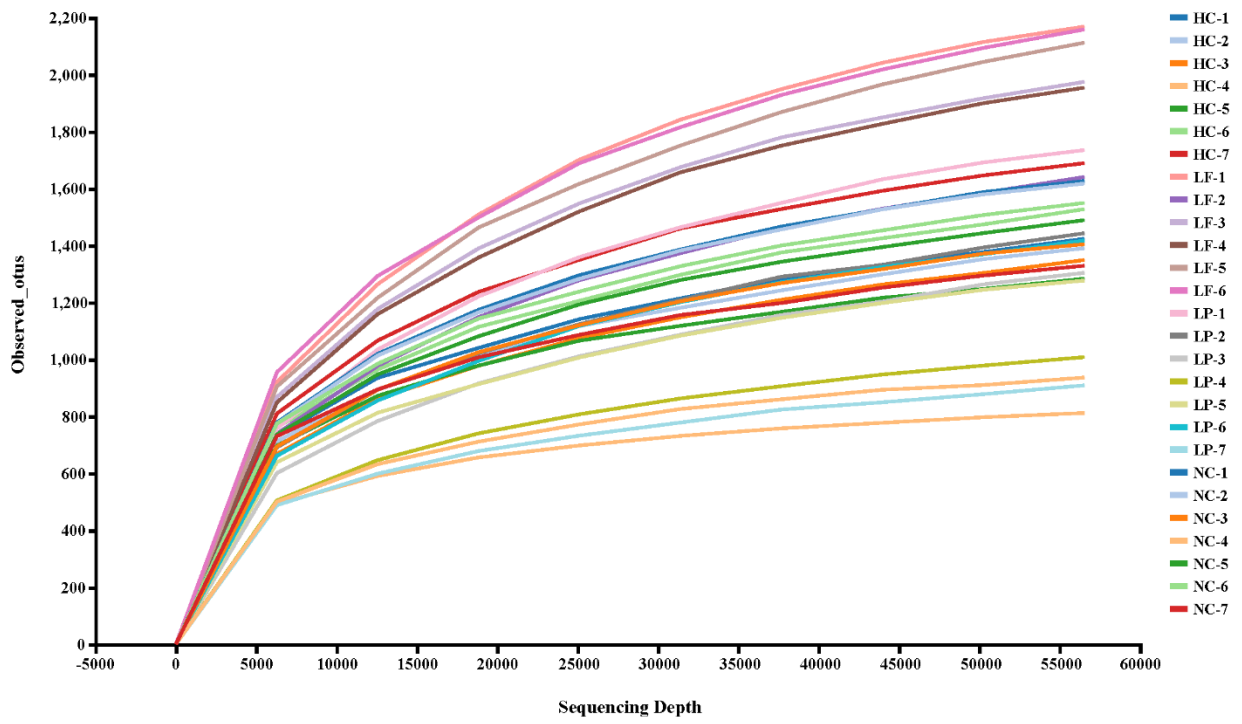

Figure S4. Alpha rarefaction curve.

Sequence Read Archive (SRA) was uploaded in NCBI #PRJNA727412:

<https://www.ncbi.nlm.nih.gov/bioproject/PRJNA727412>

16S rDNA sequence of *Lactobacillus plantarum* ZY08 (1509bp), provided by Zhiyao Zheng:

CTGGCTCAGGACGAACGCTGGCGGGCGTGCCTAATACATGCAAGTCGAACGAACTCTGGTA  
TTGATTGGTGCTTGCATCATGATTTACATTTGAGTGAGTGGCGAACTGGTGAGTAACACGT  
GGGAAACCTGCCCAGAAGCGGGGGATAACACCTGGAAACAGATGCTAATACCGCATAAC  
AACTTGGACCGCATGGTCCGAGTTTGAAAGATGGCTTCGGCTATCACTTTTGGATGGTCCC  
GCGGCGTATTAGCTAGATGGTGGGGTAACGGCTCACCATGGCAATGATACGTAGCCGACCT  
GAGAGGGTAATCGGCCACATTGGGACTGAGACACGGCCAAACTCCTACGGGAGGCAGC  
AGTAGGGAATCTTCCACAATGGACGAAAGTCTGATGGAGCAACGCCGCGTGAGTGAAGA  
AGGGTTTCGGCTCGTAAACTCTGTTGTAAAGAAGAACATATCTGAGAGTAACTGTTCA  
GGTATTGACGGTATTTAACCAGAAAGCCACGGCTAACTACGTGCCAGCAGCCGCGGTAAT  
ACGTAGGTGGCAAGCGTTGTCCGGATTTATTGGGCGTAAAGCGAGCGCAGGCGGTTTTTT  
AAGTCTGATGTGAAAGCCTTCGGCTCAACCGAAGAAGTGCATCGGAAACTGGGAAACTT  
GAGTGCAGAAGAGGACAGTGGAACTCCATGTGTAGCGGTGAAATGCGTAGATATATGGAA  
GAACACCAGTGGCGAAGGCGGCTGTCTGGTCTGTAAGTACGCTGAGGCTCGAAAGTAT  
GGGTAGCAAACAGGATTAGATACCCTGGTAGTCCATACCGTAAACGATGAATGCTAAGTGT  
TGGAGGGTTTCCGCCCTTCAGTGCTGCAGCTAACGCATTAAGCATTCCGCCTGGGGAGTA  
CGGCCGCAAGGCTGAAACTCAAAGGAATTGACGGGGGGCCCGCACAAGCGGTGGAGCATG  
TGGTTTAATTCGAAGCTACGCGAAGAACCTTACCAGGTCTTGACATACTATGCAAATCTAA  
GAGATTAGACGTTCCCTTCGGGGACATGGATACAGGTGGTGCATGGTTGTCGTCAGCTCG



TGTCGTGAGATGTTGGGTAAAGTCCCGCAACGAGCGCAACCCTTATTATCAGTTGCCAGCA  
TTAAGTTGGGCACTCTGGTGAGACTGCCGGTGACAAACCGGAGGAAGGTGGGGATGACG  
TCAAATCATCATGCCCTTATGACCTGGGCTACACACGTGCTACAATGGATGGTACAACGA  
GTTGCGAACTCGCGAGAGTAAGCTAATCTCTTAAAGCCATTCTCAGTTCGGATTGTAGGCT  
GCAACTCGCCTACATGAAGTCGGAATCGCTAGTAATCGCGGATCAGCATGCCGCGGTGAAT  
ACGTTCCCGGGCCTTGTACACACCGCCCGTCACACCATGAGAGTTTGTAACACCCAAAGT  
CGGTGGGGTAAACCTTTTAGGAACCAGCCGCCTAAGGTGGGACAGATGATTAGGGTGAAGT  
CGTACAG

1 16S rDNA sequence of *Lactobacillus fermentum* ZJUIDS06 (1510bp), provided by Zhiyao Zheng:

2 CAGGATGAACGCCGGCGGTGTGCCTAATACATGCAAGTCGAACGCGTTGGCCCAATTGAT  
3 TGATGGTGCTTGCACCTGATTGATTTTGGTCGCCAACGAGTGGCGGACGGGTGAGTAACA  
4 CGTAGGTAACCTGCCCAGAAGCGGGGGACAACATTTGGAAACAGATGCTAATACCGCATA  
5 ACAGCGTTGTTTCGCATGAACAACGCTTAAAAGATGGCTTCTCGCTATCACTTCTGGATGGA  
6 CCTGCGGTGCATTAGCTTGTGGTGGGGTAACGGCCTACCAAGGCGATGATGCATAGCCG  
7 AGTTGAGAGACTGATCGGCCACAATGGGACTGAGACACGGCCATACTCCTACGGGAGG  
8 CAGCAGTAGGGAATCTTCCACAATGGGCGCAAGCCTGATGGAGCAACACCGCGTGAGTG  
9 AAGAAGGGTTTCGGCTCGTAAAGCTCTGTTGTTAAAGAAGAACACGTATGAGAGTAACTG  
10 TTCATACGTTGACGGTATTTAACCAGAAAGTCACGGCTAACTACGTGCCAGCAGCCGCGGT  
11 AATACGTAGGTGGCAAGCGTTATCCGGATTTATTGGGCGTAAAGAGAGTGCAGGCGGTTTT  
12 CTAAGTCTGATGTGAAAGCCTTCGGCTTAACCGGAGAAGTGCATCGGAAACTGGATAACT  
13 TGAGTGCAGAAGAGGGTAGTGGAAGTCCATGTGTAGCGGTGGAATGCGTAGATATATGGA  
14 AGAACACCAGTGGCGAAGGCGGCTACCTGGTCTGCAACTGACGCTGAGACTCGAAAGCA  
15 TGGGTAGCGAACAGGATTAGATACCCTGGTAGTCCATGCCGTAAACGATGAGTGCTAGGT  
16 GTTGGAGGGTTTCCGCCCTTCAGTGCCGGAGCTAACGCATTAAGCACTCCGCCTGGGGAG  
17 TACGACCGCAAGGTTGAAACTCAAAGGAATTGACGGGGGCCCGCACAAAGCGGTGGAGCA  
18 TGTGGTTTAATTCGAAGCTACGCGAAGAACCTTACCAGGTCTTGACATCTTGCGCCAACCC  
19 TAGAGATAGGGCGTTTCCTTCGGGAACGCAATGACAGGTGGTGCATGGTCGTCGTCAGCT  
20 CGTGTCGTGAGATGTTGGGTAAAGTCCCGCAACGAGCGCAACCCTTGTTACTAGTTGCCA  
21 GCATTAAGTTGGGCACTCTAGTGAGACTGCCGGTGACAAACCGGAGGAAGGTGGGGACG  
22 ACGTCAGATCATCATGCCCTTATGACCTGGGCTACACACGTGCTACAATGGACGGTACAA

23 CGAGTCGCGAACTCGCGAGGGCAAGCAAATCTCTTAAAACCGTTCTCAGTTCGGACTGCA  
24 GGCTGCAACTCGCCTGCACGAAGTCGGAATCGCTAGTAATCGCGGATCAGCATGCCGCGG  
25 TGAATACGTTCCCGGGCCTTGTACACACCGCCCGTCACACCATGAGAGTTTGTAACACCC  
26 AAAGTCGGTGGGGTAACCTTTTAGGAGCCAGCCGCCTAAGGTGGGACAGATGATTAGGGT  
27 GAAGTCGTAC
